# Supplementary material for: Suppressing multiphase transitions of an O3-NaNi0.5Mn0.5O2 cathode by iron and magnesium co-doping towards sodium-ion batteries
Source: Royal Society of Chemistry journal article supplement (doi:10.1039/d1qm00079a), 2021-01-01
Supplement: d1qm00079a1.pdf [file d1qm00079a1.pdf]

## Electronic Supplementary Information (ESI)

### Suppressing multiphase transitions of O3-NaNi<sub>0.5</sub>Mn<sub>0.5</sub>O<sub>2</sub> cathode by iron and magnesium co-doping towards sodium-ion batteries

Xiaoyan Zhang,<sup>‡</sup> Yanan Zhou,<sup>‡</sup> Lianzheng Yu, Si-Yuan Zhang, Xuan-Xuan Xin, Wenlong Wang and Sailong Xu\*

State Key Laboratory of Chemical Resource Engineering, Beijing University of Chemical Technology, Beijing 100029, China. E-mail: xusl@mail.buct.edu.cn.

<sup>‡</sup> Y. Zhang and Y.-N. Zhou contributed equally to this work.

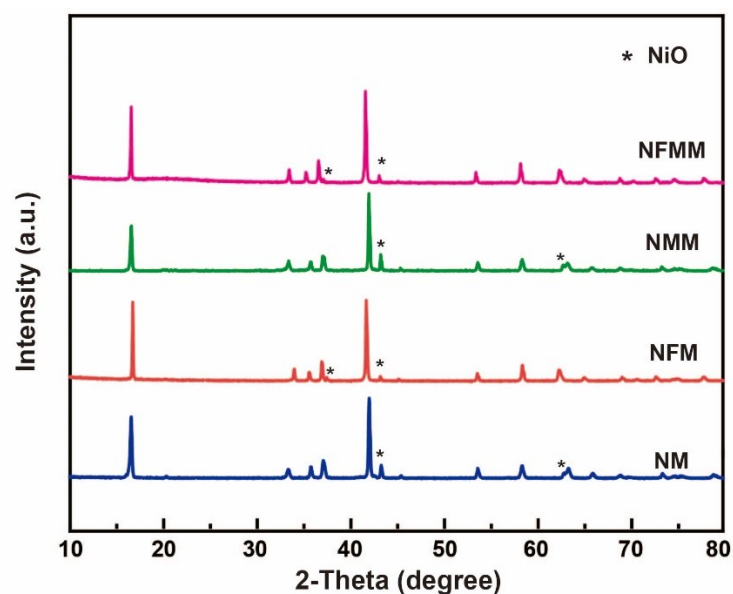

Figure S1. XRD patterns of the prepared samples.

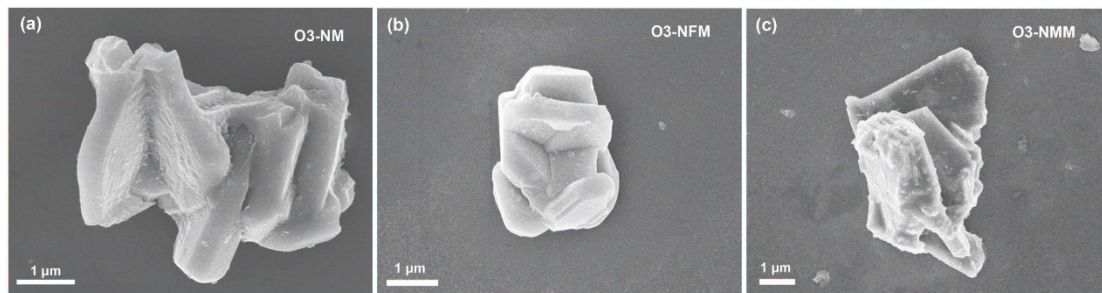

**Figure S2.** SEM images of (a) O3-NM, (b) O3-NFM, and (c) O3-NMM material for comparison.

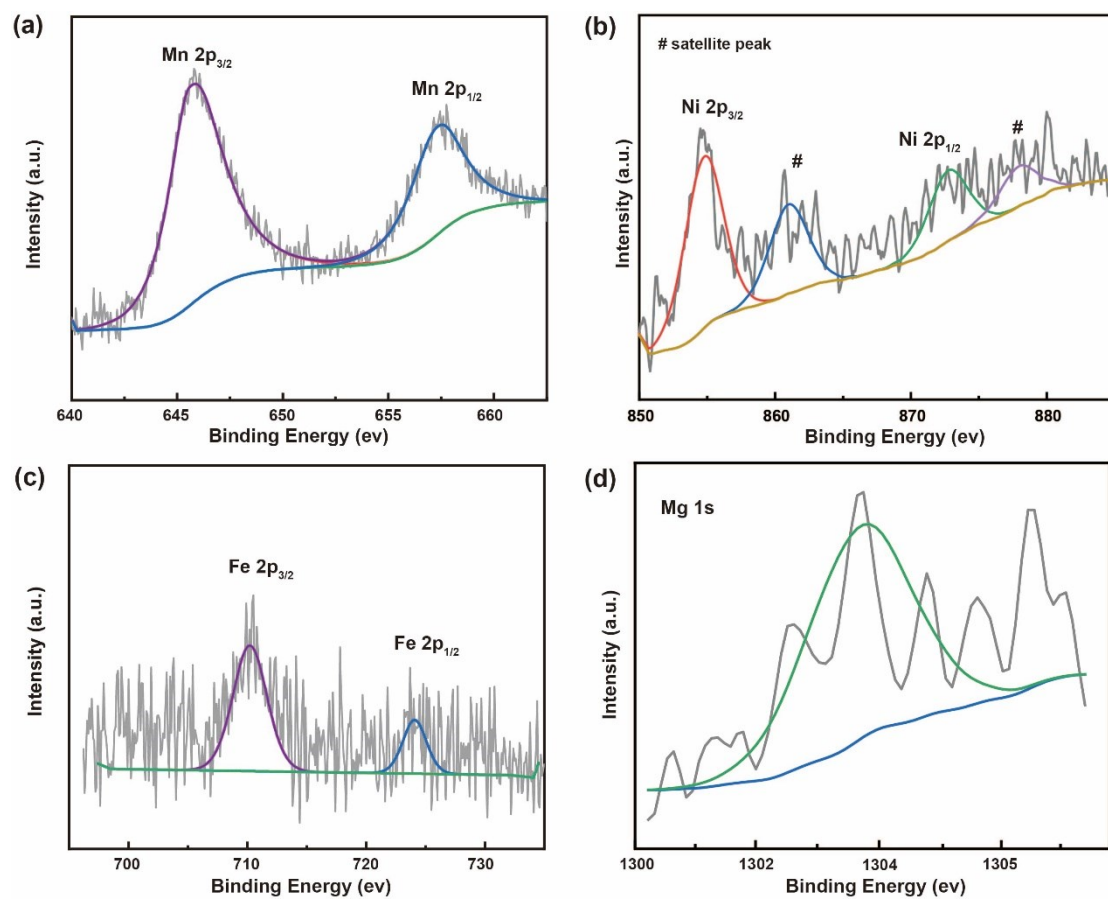

**Figure S3.** XPS spectra of (a) Mn 2p , (b) Ni 2p, (c) Fe 2p, and (d) Mg 1s for the O3-NFMM material.

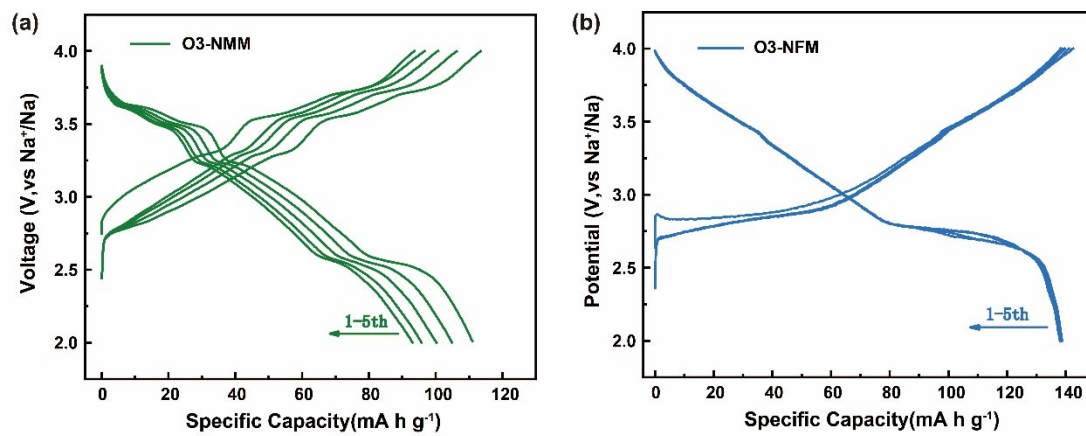

**Figure S4.** The charge/discharge curves of (a) O3-NMM and (b) O3-NFM for comparison.

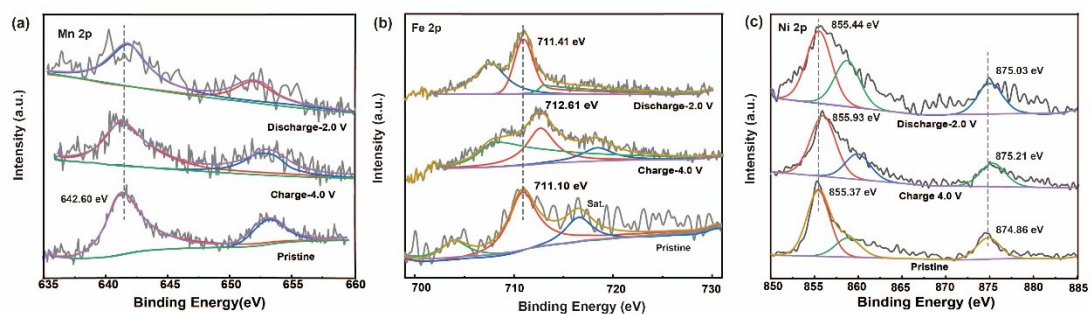

**Figure S5.** XPS spectra of (a) Mn 2p, (b) Fe 2p and (c) Ni 2p in O3-NFMM at different state during the first charge/discharge process.

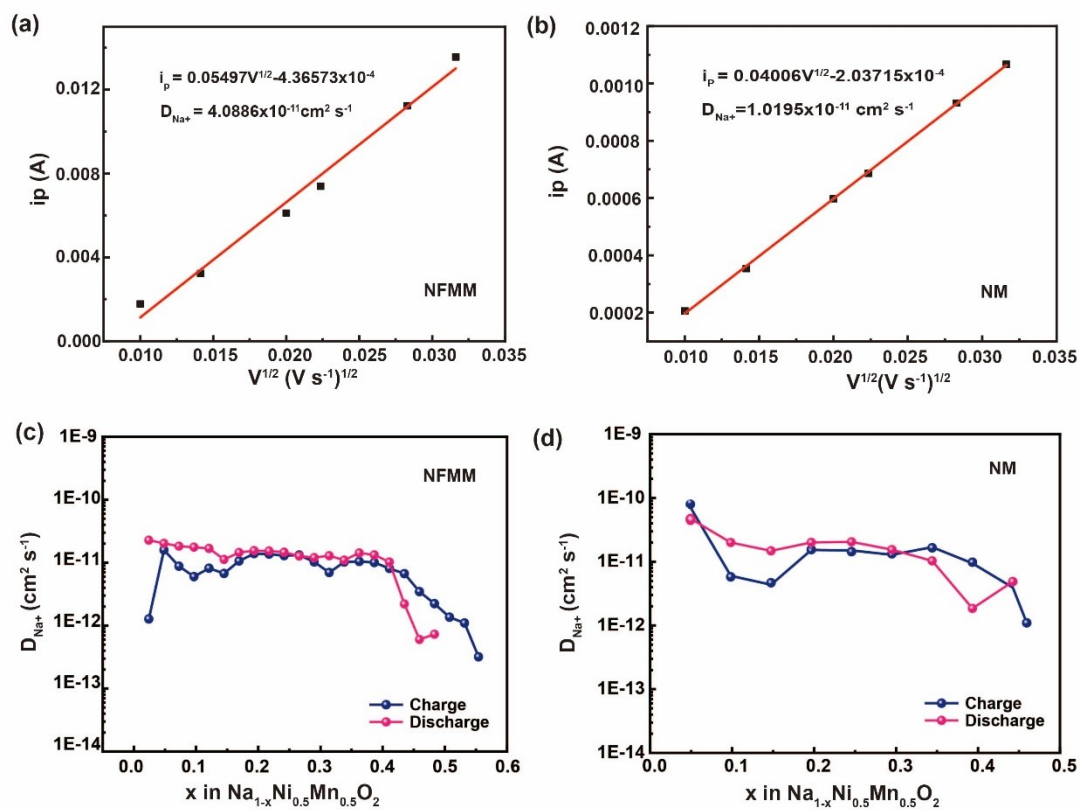

**Figure S6.** Peak current  $I_p$  as a function of the square root of scan rate  $v^{1/2}$  of (a) O3-NFMM and (b) O3-NM based on variable CV test.  $\text{Na}^+$  diffusion coefficients of (c) O3-NFMM and (d) O3-NM during charge/discharge process based on GITT test.

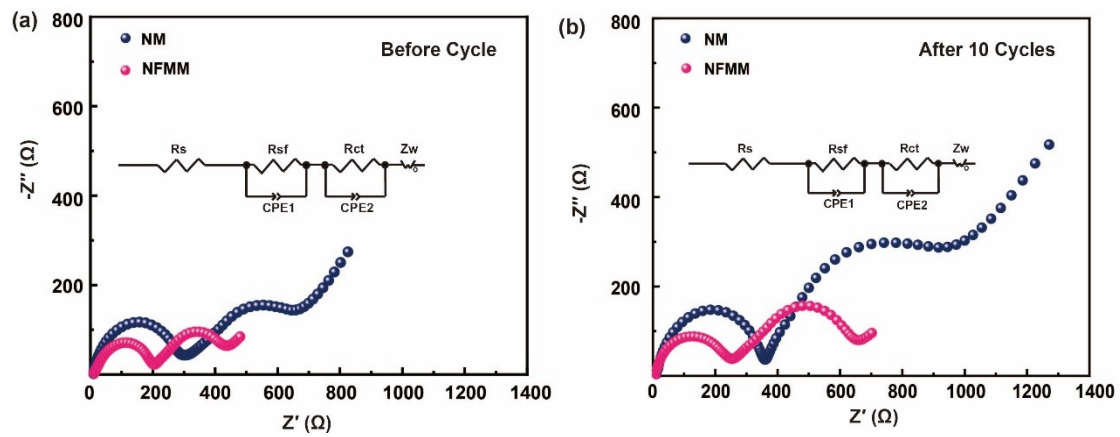

**Figure S7.** Comparison of EIS spectra between the O3-NM and O3-NFMM cathodes measured (a) before and (b) after 10 cycles .

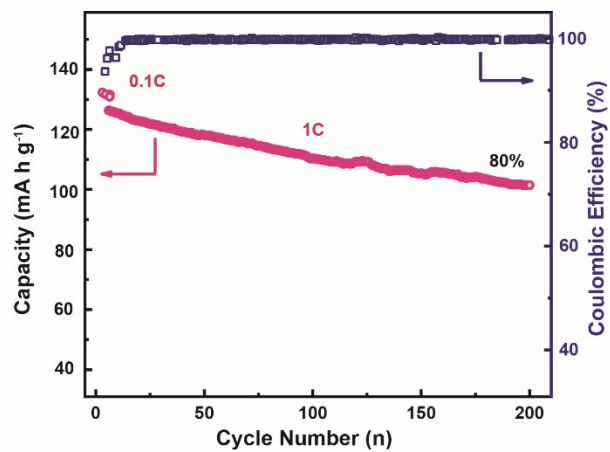

**Figure S8.** Capacity retention of O3-NFMM for sodium-ion full batteries during 200 cycles at 1 C rate (the first five cycles for the activation process at 0.1 C).



**Table S1**

Structural parameters and atomic positions of O3-NFMM from Rietveld refinement.

| <b>Atom</b> | <b>Site</b> | <b>x</b>    | <b>y</b>    | <b>z</b>     | <b>Occ</b> |          |
|-------------|-------------|-------------|-------------|--------------|------------|----------|
| <b>Na</b>   | 3a          | 0.00000     | 0.00000     | 0.00000      | 1          |          |
| <b>Ni</b>   | 3b          | 0.00000     | 0.00000     | 0.50000      | 0.35       |          |
| <b>Fe</b>   | 3b          | 0.00000     | 0.00000     | 0.50000      | 0.2        |          |
| <b>Mg</b>   | 3b          | 0.00000     | 0.00000     | 0.50000      | 0.05       |          |
| <b>Mn</b>   | 3b          | 0.00000     | 0.00000     | 0.50000      | 0.4        |          |
| <b>O</b>    | 6c          | 0.00000     | 0.00000     | 0.23094      | 1          |          |
|             |             | a= 2.96937Å | c=16.03337Å | V=122.42897Å | Rwp=7.21%  | Rp=5.64% |

**Table S2**

Structural parameters and atomic position of O3-NM from Rietveld refinement.

| <b>Atom</b> | <b>Site</b> | <b>x</b>    | <b>y</b>     | <b>z</b>  | <b>Occ</b> |
|-------------|-------------|-------------|--------------|-----------|------------|
| <b>Na</b>   | 3a          | 0.00000     | 0.00000      | 0.00000   | 1          |
| <b>Ni</b>   | 3b          | 0.00000     | 0.00000      | 0.50000   | 0.5        |
| <b>Mn</b>   | 3b          | 0.00000     | 0.00000      | 0.50000   | 0.5        |
| <b>O</b>    | 6c          | 0.00000     | 0.00000      | 0.22792   | 1          |
| a=2.95261Å  |             | c=16.00056Å | V=120.80337Å | Rwp=4.97% | Rp=3.50%   |

**Table S3**

Atomic distances, slab thickness (TMO<sub>6</sub>), the d-spacings of the Na layer and the Inter-slab distance for as-prepared materials.

| <b>Samples</b>                | <b>NM</b> | <b>NFMM</b> |
|-------------------------------|-----------|-------------|
| <b>TM-O (Å)</b>               | 1.96632   | 2.00019     |
| <b>TM-TM (Å)</b>              | 2.95262   | 2.96937     |
| <b>TMO<sub>2</sub> (Å)</b>    | 1.96017   | 2.06104     |
| <b>Interslab distance (Å)</b> | 5.33352   | 5.34445     |

**Table S4**

Impedance parameters derived from the equivalent circuit model for all the samples before cycle and after 10 cycles.

| Sample         | Before Cycling |                 |                 | After 10 Cycles |                 |                 |
|----------------|----------------|-----------------|-----------------|-----------------|-----------------|-----------------|
|                | $R_s/\Omega$   | $R_{sf}/\Omega$ | $R_{ct}/\Omega$ | $R_s/\Omega$    | $R_{sf}/\Omega$ | $R_{ct}/\Omega$ |
| <b>O3-NM</b>   | 10.30          | 271.70          | 493.80          | 12.40           | 344.60          | 938.50          |
| <b>O3-NFMM</b> | 4.19           | 173.10          | 151.00          | 9.16            | 225.50          | 492.30          |
